# Supplementary material
Source: PubMed Central journal article supplement (PMC6583857)
Supplement: jamaophthalmol-136-1251-s001.pdf [file jamaophthalmol-136-1251-s001.pdf]

## Supplementary Online Content

Obeid A, Gao X, Ali FS, et al. Loss to Follow-up Among Patients With Neovascular Age-Related Macular Degeneration Who Received Intravitreal Anti-Vascular Endothelial Growth Factor Injections. *JAMA Ophthalmol*. Published online August 23, 2018.  
doi:10.1001/jamaophthalmol.2018.3578

eTable. Sensitivity Analysis Comparing Different Thresholds of Loss to Follow-Up Among Patients Receiving Anti-Vascular Endothelial Growth Factor for Neovascular Age Related Macular Degeneration

This supplementary material has been provided by the authors to give readers additional information about their work.

**eTable. Sensitivity Analysis Comparing Different Thresholds of Loss to Follow-Up among Patients Receiving Anti-Vascular Endothelial Growth Factor for Neovascular Age Related Macular Degeneration**

| Variable             | Multivariate Model <sup>b</sup><br>(12-Month Interval) |         | Multivariate Model <sup>b</sup><br>(6-Month Interval) |         | Multivariate Model <sup>b</sup><br>(3-Month Interval) |         |
|----------------------|--------------------------------------------------------|---------|-------------------------------------------------------|---------|-------------------------------------------------------|---------|
|                      | Odds Ratio (95% CI)                                    | P-Value | Odds Ratio (95% CI)                                   | P-Value | Odds Ratio (95% CI)                                   | P-Value |
| Age (years)          |                                                        |         |                                                       |         |                                                       |         |
| ≤80                  | Reference                                              |         | Reference                                             |         | Reference                                             |         |
| 81-85                | 1.58 (1.38, 1.82)                                      | <0.001  | 1.58 (1.39, 1.79)                                     | <0.001  | 1.37 (1.23, 1.53)                                     | <0.001  |
| 86-90                | 2.29 (2.00, 2.62)                                      | <0.001  | 2.04 (1.80, 2.32)                                     | <0.001  | 1.70 (1.52, 1.90)                                     | <0.001  |
| >90                  | 3.31 (2.83, 3.86)                                      | <0.001  | 2.87 (2.47, 3.33)                                     | <0.001  | 2.08 (1.81, 2.40)                                     | <0.001  |
| Race                 |                                                        |         |                                                       |         |                                                       |         |
| White                | Reference                                              |         | Reference                                             |         | Reference                                             |         |
| African American     | 1.47 (1.00, 2.16)                                      | 0.05    | 1.75 (1.23, 2.49)                                     | 0.002   | 1.32 (0.94, 1.86)                                     | 0.11    |
| Asian                | 2.63 (1.71, 4.03)                                      | <0.001  | 2.20 (1.45, 3.33)                                     | <0.001  | 1.40 (0.93, 2.08)                                     | 0.10    |
| Other <sup>a</sup>   | 3.07 (1.38, 6.82)                                      | 0.006   | 4.39 (1.99, 9.70)                                     | <0.001  | 2.06 (0.89, 4.79)                                     | 0.09    |
| Unreported           | 2.29 (1.96, 2.68)                                      | <0.001  | 2.24 (1.93, 2.60)                                     | <0.001  | 1.74 (1.50, 2.03)                                     | <0.001  |
| Regional average AGI |                                                        |         |                                                       |         |                                                       |         |
| >\$100,000           | Reference                                              |         | Reference                                             |         | Reference                                             |         |
| \$76-100,000         | 1.28 (1.08, 1.50)                                      | 0.004   | 1.24 (1.06, 1.44)                                     | 0.006   | 1.40 (1.23, 1.59)                                     | <0.001  |
| \$51-75,000          | 1.35 (1.17, 1.56)                                      | <0.001  | 1.34 (1.18, 1.53)                                     | <0.001  | 1.56 (1.39, 1.75)                                     | <0.001  |
| ≤\$50,000            | 1.52 (1.30, 1.79)                                      | <0.001  | 1.39 (1.20, 1.61)                                     | <0.001  | 1.49 (1.31, 1.70)                                     | <0.001  |
| Distance (miles)     |                                                        |         |                                                       |         |                                                       |         |
| ≤10                  | Reference                                              |         | Reference                                             |         | Reference                                             |         |
| 11-20                | 1.05 (0.91, 1.20)                                      | 0.51    | 1.03 (0.91, 1.17)                                     | 0.65    | 0.99 (0.88, 1.10)                                     | 0.79    |
| 21-30                | 1.33 (1.05, 1.69)                                      | 0.02    | 1.33 (1.06, 1.66)                                     | 0.01    | 1.35 (1.09, 1.66)                                     | 0.005   |
| >30                  | 1.55 (1.28, 1.88)                                      | <0.001  | 1.57 (1.31, 1.89)                                     | <0.001  | 1.21 (1.02, 1.43)                                     | 0.03    |
| Eye involvement      |                                                        |         |                                                       |         |                                                       |         |
| Bilateral            | Reference                                              |         | Reference                                             |         | Reference                                             |         |
| Unilateral           | 1.44 (1.28, 1.61)                                      | <0.001  | 1.29 (1.16, 1.43)                                     | <0.001  | 1.08 (0.99, 1.18)                                     | 0.09    |

Abbreviations: AGI, adjusted gross income; CI, confidence interval.

<sup>a</sup>Other included Hispanics, Native Americans, and Pacific Islanders

<sup>b</sup>Multivariate analysis adjusted for age, race, regional average AGI, distance, and eye involvement.
